# Supplementary material
Source: publisher figshare collection journal article supplement (https://gsajournals.figshare.com/ndownloader/files/15285311)
Supplement: Supplementary file 1 [file 15285311]

**Figure S1.** Impact of exogenous expression of *HTZ1* or *FUM1* on *htz1*Δ, *fum1*Δ, and *fum1*Δ*htz1*Δ mutants during DNA replication stress. Cells with genotypes as indicated were grown overnight in selective medium (lacking leucine or uracil), then three μL of 10-fold serial dilutions were spotted onto rich medium (YPD) containing 2×PBS with or without the indicated concentrations of fumarate and/or HU and incubated at 30°C for two or three days prior to imaging.

**Figure S2.** Exogenous fumarate suppresses sensitivity to DNA replication stress of *htz1*Δ and *swr1*Δ mutants. Cells with indicated genotypes were grown overnight in rich medium (YPD), then were analyzed as described in Figure S1.

**Figure S3.** DNA damage sensitivity of components of the MRX complex to hydroxyurea is largely unaffected by exogenous fumarate. Cells with indicated genotypes were grown overnight in rich medium (YPD), then were analyzed as described in Figure S1.

**Figure S4.** Overexpression of *JHD2*. A) Total cellular RNA from strains with the indicated genotypes were analyzed by RT-qPCR for expression of *JHD2* relative to *ACT1*. The levels of *JHD2* transcripts relative to *ACT1* transcripts were calculated as , where “X” is the indicated genotype. B) Whole cell extracts of strains with indicated genotypes were analyzed by immunoblotting with anti-FLAG and anti-Pgk1p (loading control) antibodies. C) For all replicates, the levels of FLAG-Jhd2p were normalized to Pgk1p, and expressed relative to that observed in wild-type cells expressing FLAG-Jhd2p, which was set to 1 (Avg. +/- STD, n=3; representative experiment from three independent experiments shown in B). The levels of FLAG-Jhd2p relative to Pgk1p were calculated as , where “X” is the indicated genotype. The statistical analyses were performed using Wilcoxon Rank Sum test and P-value ≤ 0.05 is shown by *.

**Figure S5.** Loss of *FUM1* restores H3 K4me2 levels in *htz1*Δ mutants. WT, *htz1*Δ, *fum1*Δ and *fum1*Δ *htz1*Δ mutants carrying an empty vector or a vector for overexpression of Jhd2p (*FLAG*-*JHD2*) were grown in selective media and harvested. Whole cell extracts were prepared and used for immunoblotting using anti-H3 K4me3, anti-H3 K4me2, anti-H3 K36me3, anti-H3 K79me3 and anti-H3 (loading control) antibodies. A representative experiment is shown in (A), and Avg. +/- STD of three independent experiments are shown in (B). Whole cell extracts from WT and *htz1*Δ, *fum1*Δ and *fum1*Δ *htz1*Δ mutants carrying a vector for overexpression of Jhd2p (*FLAG*-*JHD2*) and grown in selective media were used in immunoblots using anti-FLAG or anti-Pgk1p (loading control) antibodies. A representative experiment is shown in (C), and Avg. +/- STD of three independent experiments are shown in (D), which includes Figure S4C data. The statistical analyses were performed using Wilcoxon Rank Sum test and P-value ≤ 0.05 is shown by *.

**Figure S6.** Analysis of cell cycle progression of wild-type yeast and *htz1*Δ mutants upon exposure to hydroxyurea and/or fumarate. Cultures were grown logarithmically at 30oC in rich (YPD) medium, then arrested in G1 by the addition of α-factor, and incubated for three hours. Cultures were then released into YPD containing 2×PBS in the presence or absence of 100 mM HU and 5 mM fumarate as noted. Cells were collected during logarithmic growth, during G1 arrest, and every 20 minutes after release from G1, then stained with propidium iodide and analyzed by flow cytometry.

**Figure S7.** Intra-S phase checkpoint is activated upon exposure to hydroxyurea +/- fumarate. Wild-type yeast and *htz1*Δ mutants were grown logarithmically at 30oC in rich (YPD) medium, then arrested in G1 by the addition of α-factor, then incubated for three hours. Cells were released from G1 into YPD medium containing 2×PBS and 100 mM HU with or without 5 mM fumarate. Aliquots were collected at indicated timepoints from each culture, and whole cells extracts were analyzed by immunoblotting using anti-Rad53p. Whole cell extract from wild-type cells treated with HU for four hours were run on blots as a reference.

**Figure S8.** YKu70p is not required for suppression of sensitivity of *htz1*Δ mutants to DNA replication stress by fumarate. Cells with indicated genotypes were grown overnight in rich medium (YPD), then were analyzed as described in Figure S1.

**Figure S9.** Sensitivity of *htz1*Δ and *htz1*Δ *fum1*Δ mutants to DNA damage caused by UV or camptothecin and the effect of fumarate. Cells with genotypes as indicated were grown overnight in selective medium (medium lacking leucine or uracil), then three μL of 10-fold serial dilutions were spotted onto YPD medium containing 2×PBS with or without the indicated concentrations of fumarate and exposed to UV (A) or camptothecin, CPT, (B) and incubated at 30°C for two days prior to imaging.

**TABLE S1.** List of yeast strains used in this study.

| **Strain** | **Genotype** | **Source** |
| --- | --- | --- |
| AKY42 | *MAT****a*** *his3*Δ*1 leu2*Δ*0 met15*Δ*0 ura3*Δ*0*  (BY4741) | (Baker Brachmann *et al.* 1998) |
| AKY5078 | AKY42 *htz1*Δ*::KanMX* | (Winzeler *et al.* 1999) |
| AKY6320 | AKY42 *fum1*Δ*::KanMX* | (Winzeler *et al.* 1999) |
| AKY6384 | *MAT****a*** *his3*Δ*1 leu2*Δ*0 met15*Δ*0 ura3*Δ*0 FUM1-GFP(S65T)-HIS3MX* | (Huh *et al.* 2003) |
| AKY6405/AKY6406 | AKY6320 *htz1*Δ*::URA3* | This study |
| AKY6427 | AKY42 *rad52*Δ*::KanMX* | (Winzeler *et al.* 1999) |
| AKY6428 | AKY42 *yku70*Δ*::KanMX* | (Winzeler *et al.* 1999) |
| AKY6576/AKY6577 | AKY5078 *yku70*Δ*::NatMX* | This study |
| AKY6584 | AKY42 *mre11*Δ*::KanMX* | (Winzeler *et al.* 1999) |
| AKY6585 | AKY42 *rad50*Δ*::KanMX* | (Winzeler *et al.* 1999) |
| AKY6586 | AKY42 *xrs2*Δ*::KanMX* | (Winzeler *et al.* 1999) |
| AKY6973 | AKY42 *exo1*Δ*::KanMX* | (Winzeler *et al.* 1999) |
| AKY6974 | AKY42 *sae2*Δ*::KanMX* | (Winzeler *et al.* 1999) |
| AKY6975 | AKY42 *sgs1*Δ*::KanMX* | (Winzeler *et al.* 1999) |
| AKY7067/AKY7068 | AKY6973 *htz1*Δ*::URA3* | This study |
| AKY7069/AKY7070 | AKY6974 *htz1*Δ*::URA3* | This study |
| AKY7071/AKY7072 | AKY6975 *htz1*Δ*::URA3* | This study |
| AKY8027/AKY8028 | AKY5078 *mre11*Δ*::HphMX* | This study |
| AKY8029/AKY8030 | AKY5078 *rad50*Δ*::HphMX* | This study |
| AKY8031/AKY8032 | AKY5078 *xrs2*Δ*::HphMX* | This study |
| AKY944 | *MAT****a*** *ade2-1 leu2-3,112 his3-11,15 trp1-1 ura3-1 can1-100 hht1-hhf1::LEU2 hht2-hhf2::HIS3* plus pAK388 | (Yang and Kirchmaier 2006) |
| AKY6663/AKY6664 | AKY944 *htz1*Δ*::HphMX* | This study |
| AKY2007/AKY2008 | AKY944 plus pAK278 | (Yang and Kirchmaier 2006) |
| AKY2330/AKY2331 | AKY944 plus pAK872 | (Yang *et al.* 2008) |
| AKY2025/AKY2026 | AKY944 plus pAK874 | This study |
| AKY2027/AKY2028 | AKY944 plus pAK875 | This study |
| AKY7053/AKY7054 | AKY6663 plus pAK872 | This study |
| AKY7049/AKY7050 | AKY6663 plus pAK874 | This study |
| AKY7051/AKY7052 | AKY6663 plus pAK875 | This study |
| AKY6667/AKY6668 | AKY2007 *htz1*Δ*::HphMX* | This study |
| AKY8388/AKY8389 | AKY42 *bar1*Δ*::HphMX* | This study |
| AKY8390/AKY8391 | AKY5078 *bar1*Δ*::HphMX* | This study |
| AKY8404 | AKY42 *ddc1*Δ*::KanMX* | (Winzeler *et al.* 1999) |
| AKY8406 | AKY42 *rad17*Δ*::KanMX* | (Winzeler *et al.* 1999) |
| AKY8407 | AKY42 *rad24*Δ*::KanMX* | (Winzeler *et al.* 1999) |
| AKY8442/AKY8443 | AKY8404 *htz1*Δ*::URA3* | This study |
| AKY8446/AKY8447 | AKY8406 *htz1*Δ*::URA3* | This study |
| AKY8448/AKY8449 | AKY8407 *htz1*Δ*::URA3* | This study |
| AKY8816/AKY8817 | AKY944 *jhd1*Δ*::KanMX* | This study |
| AKY8480/AKY8481 | AKY944 *jhd2*Δ*::KanMX* | This study |
| AKY8482/AKY8483 | AKY944 *rph1*Δ*::KanMX* | This study |
| AKY8484/AKY8485 | AKY944 *ecm5*Δ*::KanMX* | This study |
| AKY8486/AKY8487 | AKY944 *gis1*Δ*::KanMX* | This study |
| AKY8818/AKY8819 | AKY6663 *jhd1*Δ*::KanMX* | This study |
| AKY8488/AKY8489 | AKY6663 *jhd2*Δ*::KanMX* | This study |
| AKY8490/AKY8491 | AKY6663 *rph1*Δ*::KanMX* | This study |
| AKY8492/AKY8493 | AKY6663 *ecm5*Δ*::KanMX* | This study |
| AKY8494/AKY8495 | AKY6663 *gis1*Δ*::KanMX* | This study |
| AKY8563/AKY8564 | AKY8480 plus pAK278 | This study |
| AKY8565/AKY8566 | AKY8480 plus pAK872 | This study |
| AKY8567/AKY8568 | AKY8480 plus pAK874 | This study |
| AKY8569/AKY8570 | AKY8480 plus pAK875 | This study |
| AKY8579/AKY8580 | AKY8482 plus pAK278 | This study |
| AKY8595/AKY8596 | AKY8484 plus pAK278 | This study |
| AKY8611/AKY8612 | AKY8486 plus pAK278 | This study |
| AKY8627/AKY8628 | AKY8488 plus pAK278 | This study |
| AKY8629/AKY8630 | AKY8488 plus pAK872 | This study |
| AKY8631/AKY8632 | AKY8488 plus pAK874 | This study |
| AKY8633/AKY8634 | AKY8488 plus pAK875 | This study |
| AKY8643/AKY8644 | AKY8490 plus pAK278 | This study |
| AKY8659/AKY8660 | AKY8492 plus pAK278 | This study |
| AKY8693/AKY8694 | AKY8494 plus pAK278 | This study |
| AKY8877/AKY8878 | AKY8816 plus pAK278 | This study |
| AKY8903/AKY8904 | AKY8818 plus pAK278 | This study |
| AKY8710 | AKY42 *ade12*Δ*::KanMX* | (Winzeler *et al.* 1999) |
| AKY8869/AKY8870 | AKY8710 *htz1*Δ*::HphMX* | This study |
| AKY977 | *MAT****a*** *ade2-1 leu2-3,112 his3-11,15 trp1-1 can1-100 sml1::HIS3* | (Zhao *et al.* 1998) |
| AKY8687/AKY8688 | AKY977 *htz1*Δ*::URA3* | This study |
| AKY8937/AKY8938 | AKY42 plus pAK48 | This study |
| AKY8939/AKY8940 | AKY42 plus pAK1356 | This study |
| AKY8941/AKY8942 | AKY5078 plus pAK48 | This study |
| AKY8943/AKY8944 | AKY5078 plus pAK1356 | This study |
| AKY8968/AKY8969 | AKY6320 plus pAK48 | This study |
| AKY8970/AKY8971 | AKY6320 plus pAK1356 | This study |
| AKY8972/AKY8973 | AKY6405/AKY6406 plus pAK48 | This study |
| AKY8974/AKY8975 | AKY6405/AKY6406 plus pAK1356 | This study |
| AKY8947/AKY8948 | AKY42 *mrc1*Δ∷*HphMX* | This study |
| AKY8949/AKY8950 | AKY5078 *mrc1*Δ∷*HphMX* | This study |
| AKY8408/AKY8409 | AKY42 *rad9*Δ∷*HphMX* | This study |
| AKY8442/AKY8443 | AKY5078 *rad9*Δ∷*HphMX* | This study |
| AKY5075 | AKY42 *swr1*Δ∷*KanMX* | (Winzeler *et al.* 1999) |
| AKY8976/AKY8977 | AKY42 plus pAK55 | This study |
| AKY8978/AKY8979 | AKY42 plus pAK991 | This study |
| AKY8980/AKY8981 | AKY5078 plus pAK55 | This study |
| AKY8982/AKY8983 | AKY5078 plus pAK991 | This study |
| AKY8984/AKY8985 | AKY42 plus pAK28 | This study |
| AKY8986/AKY8987 | AKY42 plus pAK1351 | This study |
| AKY8988/AKY8989 | AKY6320 plus pAK28 | This study |
| AKY8990/AKY8991 | AKY6320 plus pAK1351 | This study |
| AKY8992/AKY8993 | AKY8980/AKY8981 *fum1*Δ*::HphMX* | This study |
| AKY8994/AKY8995 | AKY8982/AKY8983 *fum1*Δ*::HphMX* | This study |
| AKY8996/AKY8997 | AKY6405/AKY6406 plus AK28 | This study |
| AKY8998/AKY8999 | AKY6405/AKY6406 plus AK1351 | This study |

**TABLE S2.** List of plasmids used in this study.

| **Plasmid** | **Description** | **Source** |
| --- | --- | --- |
| pAK278 | *HHT2-HHF2 ARS4/CEN6/TRP1* | (Kelly *et al.* 2000) |
| pAK388 | *HHT2-HHF2 ARS4/CEN6/URA3* | P. Kaufman |
| pAK872 | H3 K4R/H4 *ARS4/CEN6/TRP1* | (Fingerman *et al.* 2007) |
| pAK874 | H3 K36R/H4 *ARS4/CEN6/TRP1* | (Fingerman *et al.* 2007) |
| pAK875 | H3 K79R/H4 *ARS4/CEN6/TRP1* | (Fingerman *et al.* 2007) |
| pAK15 | *pFA6-KanMX4* | (Wach *et al.* 1994) |
| pAK808 | *pFA6-NatMX4* | (Goldstein and McCusker 1999) |
| pAK804 | *pFA6-HphMX4* | (Goldstein and McCusker 1999) |
| pAK28 | *pRS425 (2µ LEU2)* | (Christianson *et al.* 1992) |
| pAK1351 | *CMD1p-FUM1*  PlasmID Clone ID *(ScCD00098272)* | Harvard PlasmID database |
| pAK55 | *pRS316 (ARS/CEN/URA3)* | (Sikorski and Hieter 1989) |
| pAK991 | *HA-HTZ1 in pRS316* | (Chen *et al.* 2012) |
| pAK48 | *pRS415 (ARS4/CEN6/LEU2)* | (Christianson *et al.* 1992) |
| pAK1356 | *PYK1p-FLAG-JHD2* | (Mersman *et al.* 2009) |

**TABLE S3.** List of oligonucleotides used in this study.

| **Region** | **Oligonucleotide** | **Application** | **Source** |
| --- | --- | --- | --- |
| *KanMX* | oALK72 5' CTGCAGCGAGGAGCCGTAAT | Reverse Screening Primer | (Miller *et al.* 2008) |
| *NatMX* | oALK217 5' TTCGTCGTCGGGGAACACCTT | Reverse Screening Primer | (Yang and Kirchmaier 2006) |
| *HphMX* | oALK612 5’GTAGAAACCATCGGCGCAGC | Reverse Screening Primer | (Chen *et al.* 2012) |
| *URA3* | oALK908 5’CGTTCACCCTCTACCTTAGC | Reverse Screening Primer | This study |
| *JHD1* | oALK1685 5’ACATCTAATAGAAGTGGGTGATTATAATGAGTAAGAAGACGTAATGATCATAAAACAAAA oALK1686 5’TCAATTGCTAAAGTAGATCTCATTCATCGAGAGCATAGGATGAAATAAAAGATACAAGAA | Gene Disruption | This study |
| *JHD1* | oALK1525 5’GTAATGATCATAAAACAAAATACTAATAAGCTATGGTGCACGTACGCTGCAGGTCGAC oALK1526 5’GAAATAAAAGATACAAGAACGTGGCGGACAAGAAGAAATTATCGATGAATTCGAGCTCG | Gene Disruption | This study |
| *JHD1* | oALK1683  5’GCGTTCTCCCCATTTCAATA | Forward Screening Primer | This study |
| *JHD2* | oALK1640 5’ATTAACTAATCTCATCTTGCACAAAAAACGTATCACTATCCGTACGCTGCAGGTCGAC oALK1641 5’TATTCTAAAAAATCATTACGCCATACACAAATATTGAAGAATCGATGAATTCGAGCTCG | Gene Disruption | This study |
| *JHD2* | oALK1652  5’GCCAAGTGCCATCAAGAACT | Forward Screening Primer | This study |
| *RPH1* | oALK1642 5’ATAAGACTGTCTTGGTGAGGATATTCAGTTGCGTGAAATCCGTACGCTGCAGGTCGAC oALK1643 5’TCAAAATGAGAGATCTCGGTAAACTGGCAATCGTGAGATCGATGAATTCGAGCTCG | Gene Disruption | This study |
| *RPH1* | oALK1653  5’GGGTTTGGTGAATCGAGAAA | Forward Screening Primer | This study |
| *ECM5* | oALK1644 5’CGTGTATGTTCTTGTTCGTACGTCCATCTCCATAGTTATACGTACGCTGCAGGTCGAC oALK1645 5’AAGTAAATAGTGATTTTAATCAATAAGATAGTATTACGTTATCGATGAATTCGAGCTCG | Gene Disruption | This study |
| *ECM5* | oALK1654  5’GGCGCAATTAACCAAGTCCT | Forward Screening Primer | This study |
| *GIS1* | oALK1646 5’TTTTTTTTAATTTGAAGAATAGCTACAAAAACAGACTACACGTACGCTGCAGGTCGAC oALK1647 5’AAATTTTTTTTGAACCCATTTTGTATATCATTTTCTTGACATCGATGAATTCGAGCTCG | Gene Disruption | This study |
| *GIS1* | oALK1655  5’AACGCGTGTGTGAGTTGTGT | Forward Screening Primer | This study |
| *MRE11* | oALK1595 5’GACGCAAGTTGTACCTGCTCAGATCCGATAAAACTCGACTGCTACGCTGCAGGTCGAC oALK1596 5’TGTACTTGATCCCTATATTATATTATATCCTATTTATAACATCGATGAATTCGAGCTCG | Gene Disruption | This study |
| *MRE11* | oALK1597  5’GAAATGGAAGTCGATCCATCA | Forward Screening Primer | This study |
| *RAD50* | oALK1598 5’CCATTGAGAGGCAAAAACAAGGGAACGGAAAGCAGGGCTACGCTGCAGGTCGAC oALK1599 5’AAAGACCCCATAATATCTACGAAGGGATAGACTTTGATTGATCGATGAATTCGAGCTCG | Gene Disruption | This study |
| *RAD50* | oALK1600  5’TCTAACAAGCCATCAAAAGCA | Forward Screening Primer | This study |
| *XRS2* | oALK1542 5’AGATGAGCAACAATACTGAGAAGGTGATAACTATAAATTTCGTACGCTGCAGGTCGAC oALK1543 5’TATAATTTAATGAAATTGGAAATACTCGGAAAATTTATCAATCGATGAATTCGAGCTCG | Gene Disruption | This study |
| *XRS2* | oALK1544  5’AGGGACAGTCATAGCGGTCA | Forward Screening Primer | This study |
| *MRC1* | oALK1690  5’TCGTTATTCGCTTTTGAACTTATCACCAAATATTTTAGTGCGTACGCTGCAGGTCGAC  oALK1691  5’CTGGAGTTCAATCAACTTCTTCGGAAAAGATAAAAAACCAATCGATGATGAATTCGAGCTCG | Gene Disruption | This study |
| *MRC1* | oALK1694  5’GTTGGAAAAAAACCAAGAACAGACAAACAACTAAGGAAGTTCGTTATTCGCTTTTGAACT  oALK1695  5’GGGTGCCATCTTTTTTAATGCGACTACTTCAAGACAGCTTCTGGAGTTCAATCAACTTCT | Gene Disruption | This study |
| *MRC1* | oALK1692  5’GCCAGAAAGAAACCCAAGAA | Forward Screening Primer | This study |
| *RAD9* | oALK1615  5’TAGAAAAGAGCATAGTGAGAAAATCTTCAACATCAGGGCTCGTACGCTGCAGGTCGAC  oALK1616  5’TCCCTTTCTATCAATTATGAGTTTATATATTTTTATAATTATCGATGAATTCGAGCTCG | Gene Disruption | This study |
| *RAD9* | oALK1617  5’GGGGAAGTGTCAGCAATGTT | Forward Screening Primer | This study |
| *HTZ1* | oALK761 5’AATTTCGCACTATAGCCGCACGTAAAAATAACTTAACATATTAACTATGCGGCATCAGAG oALK762 5’AGGGAGAATTACGGGAAATGGGAAAGAAAAACTATTCTTCACGCATCTGTGCGGTATTTC | Gene Disruption | This study |
| *HTZ1* | oALK821  5’AAAACTCCGCACGTTGCTTG | Forward Screening Primer | This study |
| *BAR1* | oALK268  5’ATCATACCAAAATAAAAAGAGTGTCTAGAAGGGTCATATACGTACGCTGCAGGTCGAC | Gene Disruption | (Kirchmaier and Rine 2006) |
| *BAR1* | oALK269  5’TGATATTTATATGCTATAAAGAAATTGTACTCCAGATTTCATCGATGAATTTCGAGCTCG | Gene Disruption | (Kirchmaier and Rine 2006) |
| *BAR1* | oALK398  5’GATCTTCGCGTGATTTAATTCTAGTGGTTCGTATCGCCTAAAATCATACCAAAATAAAAAGAGTG | Gene Disruption | (Kirchmaier and Rine 2006) |
| *BAR1* | oALK399  5’TTATTAATGCTTTCCATGTATTAAAAATGACTATATATTTGATATTTAATATGCTATAAAGAAATTG | Gene Disruption | (Kirchmaier and Rine 2006) |
| *BAR1* | oALK105  5’ATGAGTCCTTAAGAAGGCCG | Forward Screening Primer | (Kirchmaier and Rine 2006) |
| *FUM1* | oALK1473 5’AGAAATTCCATAAAGTCTAACTATTAAACGGATAAGAGATACACGTACGCTGCAGGTCGAC oALK1474 5’ATAAGACATAAAAAACTTGTATATTATTAGGTATTTAGCTCGTATCGATGAATTCGAGCTCG | Gene Disruption | This study |
| *FUM1* | oALK1464  5’GAACTAATGCTGCCAGAGAA | Forward Screening Primer | This study |
| *YKU70* | oALK1489 5’ATGATTTGTTAAGTGACTCTAAGCCTGATTTTAAAACGGGAATCGTACGCTGCAGGTCGAC oALK1490 5’ATATTGTATGTAACGTTATAGATATGAAGGATTTCAATCGTCTATCGATGAATTCGAGCTCG | Gene Disruption | This study |
| *YKU70* | oALK1482  5’ATCAACAATGCAATCCCAAC | Forward Screening Primer | This study |
| *HHF2* | oALK705 5’TTATTCTTTTCTCTATCTTTTTTCC | Sequencing | (Yang 2008) |
| *HHT2* | oALK706 5’GTTTTGTGACTTCCACTTTGGCCCT | Sequencing | (Yang 2008) |
| *JHD2* | oALK1711 5’CCAGGTCAAATTACCGGCTTT  oALK1712 5’ATTCGTCCCCATTAATATTTTTGG | qRT-PCR | This study |
| *ACT1* | oALK648 5’GACGCTCCTCGTGCTGTCTT  oALK649 5’GTCTTTTTGACCCATACCGACC | qRT-PCR | This study |

**SUPPLEMENTARY LITERATURE CITED**

Baker Brachmann C., A. Davies, G. J. Cost, E. Caputo, J. Li, *et al.*, 1998 Designer deletion strains derived fromSaccharomyces cerevisiae S288C: A useful set of strains and plasmids for PCR-mediated gene disruption and other applications. Yeast 14: 115–132. doi:10.1002/(SICI)1097-0061(19980130)14:2<115::AID-YEA204>3.0.CO;2-2

Chen J., A. Miller, A. L. Kirchmaier, and J. M. K. Irudayaraj, 2012 Single-molecule tools elucidate H2A.Z nucleosome composition. J. Cell Sci. 125: 2954–64. doi:10.1242/jcs.101592

Christianson T. W., R. S. Sikorski, M. Dante, J. H. Shero, and P. Hieter, 1992 Multifunctional yeast high-copy-number shuttle vectors. Gene 110: 119–122. doi:10.1016/0378-1119(92)90454-W

Fingerman I. M., H.-C. Li, and S. D. Briggs, 2007 A charge-based interaction between histone H4 and Dot1 is required for H3K79 methylation and telomere silencing: identification of a new trans-histone pathway. Genes Dev. 21: 2018–29. doi:10.1101/gad.1560607

Goldstein A. L., and J. H. McCusker, 1999 Three new dominant drug resistance cassettes for gene disruption in Saccharomyces cerevisiae. Yeast 15: 1541–53. doi:10.1002/(SICI)1097-0061(199910)15:14<1541::AID-YEA476>3.0.CO;2-K

Huh W.-K., J. V. Falvo, L. C. Gerke, A. S. Carroll, R. W. Howson, *et al.*, 2003 Global analysis of protein localization in budding yeast. Nature 425: 686–691. doi:10.1038/nature02026

Kelly T. J., S. Qin, D. E. Gottschling, and M. R. Parthun, 2000 Type B histone acetyltransferase Hat1p participates in telomeric silencing. Mol. Cell. Biol. 20: 7051–8. doi:10.1128/MCB.20.19.7051-7058.2000

Kirchmaier A. L., and J. Rine, 2006 Cell cycle requirements in assembling silent chromatin in Saccharomyces cerevisiae. Mol. Cell. Biol. 26: 852–62. doi:10.1128/MCB.26.3.852-862.2006

Mersman D. P., H.-N. Du, I. M. Fingerman, P. F. South, and S. D. Briggs, 2009 Polyubiquitination of the demethylase Jhd2 controls histone methylation and gene expression. Genes Dev. 23: 951–962. doi:10.1101/gad.1769209

Miller A., B. Yang, T. Foster, and A. L. Kirchmaier, 2008 Proliferating cell nuclear antigen and ASF1 modulate silent chromatin in Saccharomyces cerevisiae via lysine 56 on histone H3. Genetics 179: 793–809. doi:10.1534/genetics.107.084525

Sikorski R. S., and P. Hieter, 1989 A system of shuttle vectors and yeast host strains designed for efficient manipulation of DNA in Saccharomyces cerevisiae. Genetics 122: 19–27.

Wach A., A. Brachat, R. Pohlmann, and P. Philippsen, 1994 New Heterologous Modules for Classical or PCR-based Gene Disruptions in Saccharomyces cerevisiae. Yeast 10: 1793–1808.

Winzeler E. A., D. D. Shoemaker, A. Astromoff, H. Liang, K. Anderson, *et al.*, 1999 Functional characterization of the S. cerevisiae genome by gene deletion and parallel analysis. Science 285: 901–6. doi:10.1126/SCIENCE.285.5429.901

Yang B., and A. L. Kirchmaier, 2006 Bypassing the catalytic activity of SIR2 for SIR protein spreading in Saccharomyces cerevisiae. Mol. Biol. Cell 17: 5287–97. doi:10.1091/mbc.E06-08-0669

Yang B., 2008 Insights into the impact of histone acetylation and methylation on Sir protein recruitment, spreading and silencing in Saccharomyces cerevisiae. [PhD thesis]: Purdue University, Indiana. p.197

Yang B., J. Britton, and A. L. Kirchmaier, 2008 Insights into the Impact of Histone Acetylation and Methylation on Sir Protein Recruitment, Spreading, and Silencing in Saccharomyces cerevisiae. J. Mol. Biol. 381: 826–844. doi:10.1016/J.JMB.2008.06.059

Zhao X., E. G. Muller, and R. Rothstein, 1998 A suppressor of two essential checkpoint genes identifies a novel protein that negatively affects dNTP pools. Mol. Cell 2: 329–40. doi:10.1016/S1097-2765(00)80277-4
